# Supplementary material for: Identification of spectral biomarkers for type 1 diabetes mellitus using the combination of chiroptical and vibrational spectroscopy
Source: Royal Society of Chemistry journal article supplement (doi:10.1039/c4an01874e), 2015-01-01
Supplement: c4an01874e1.pdf [file c4an01874e1.pdf]

## SUPPLEMENTARY MATERIAL

### **Identification of spectral biomarkers for type 1 diabetes mellitus using the combination of chiroptical and vibrational spectroscopy**

**Lucie Šťovíčková<sup>a\*</sup>, Michal Tatarkovič<sup>a</sup>, Hana Logerová<sup>b</sup>, Jan Vavřinec<sup>c</sup> and Vladimír Setnička<sup>a</sup>**

*<sup>a</sup>Department of Analytical Chemistry, University of Chemistry and Technology, Prague, Technická 5, 166 28 Prague 6, Czech Republic*

*<sup>b</sup>Department of Biochemistry, Cell and Molecular Biology, Third Faculty of Medicine, Charles University Prague, Ruská 87, 100 00 Prague  
10, Czech Republic*

*<sup>c</sup>Department of Children and Adolescents, Faculty Hospital Královské Vinohrady, Šrobárova 1150/50, 100 34 Prague 10, Czech Republic*

*\*Corresponding author: email:Lucie.Habartova@vscht.cz, Tel: +420 220 443 762*

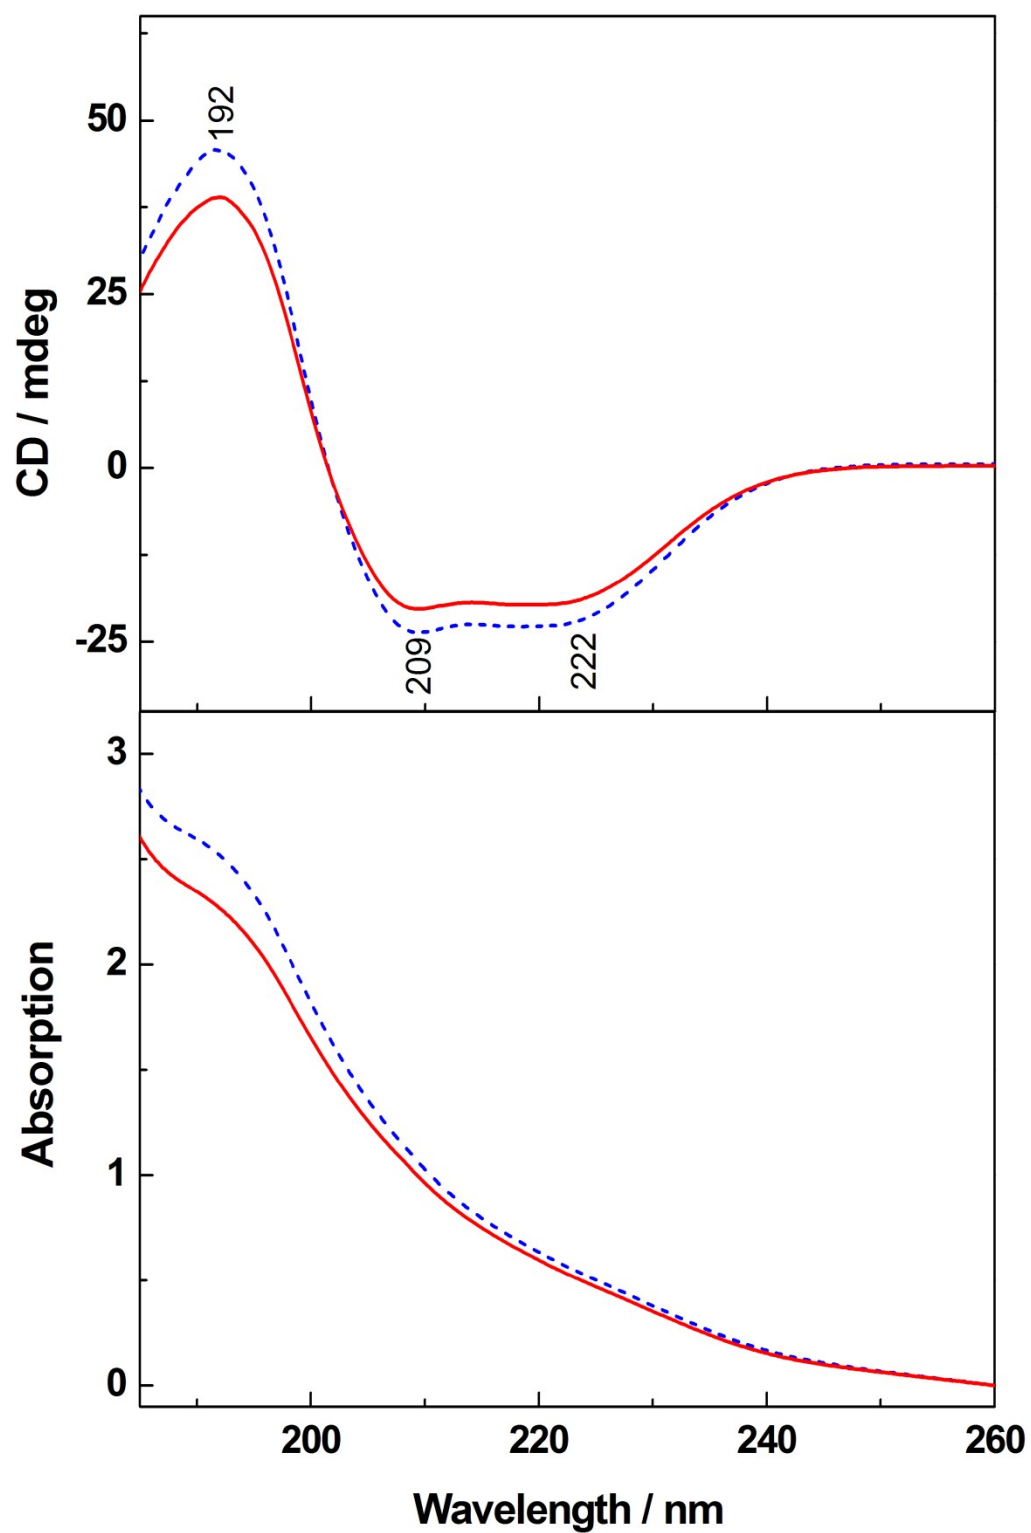

Fig. S1 The average ECD spectra (top) with simultaneously recorded absorption (bottom) of human blood plasma of T1DM patients (solid line) and healthy controls (dashed line)
